# Supplementary material for: Mechanistic Study on the Corrosion of (La,Sr)(Co,Fe)O3-δ Cathodes Induced by CO2
Source: MDPI journal article supplement (doi:10.3390/molecules28227490), 2023-11-08
Supplement: s1 [file s1]

## Supporting Information

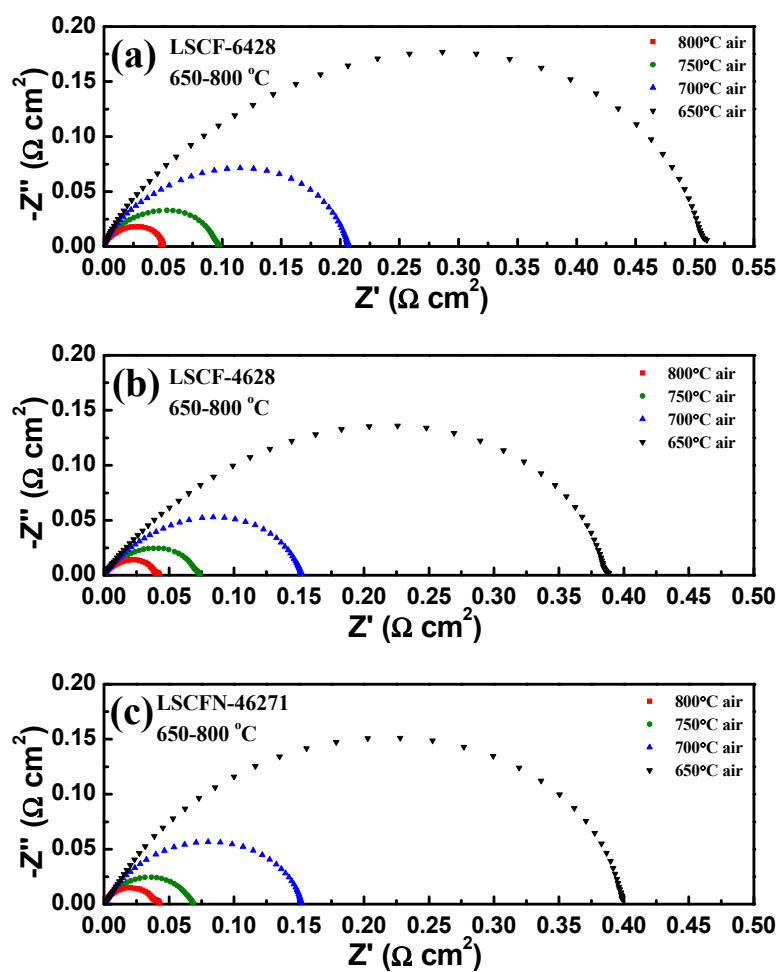

Figure S1. EIS of 3 symmetric electrodes between 650-800 °C in air.

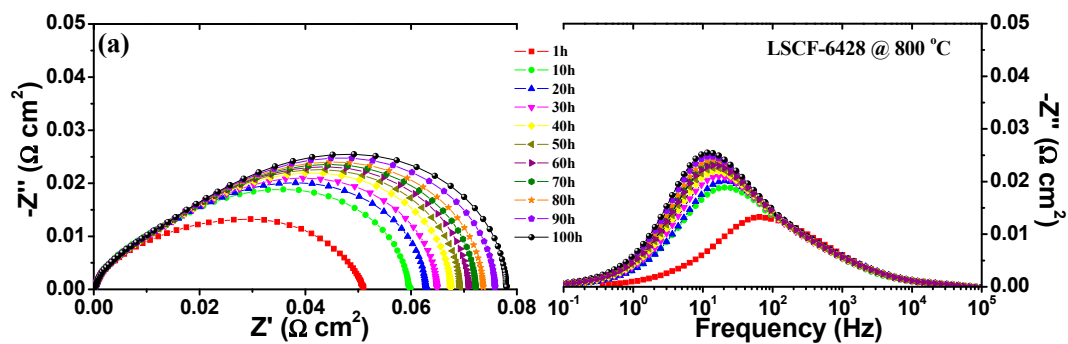

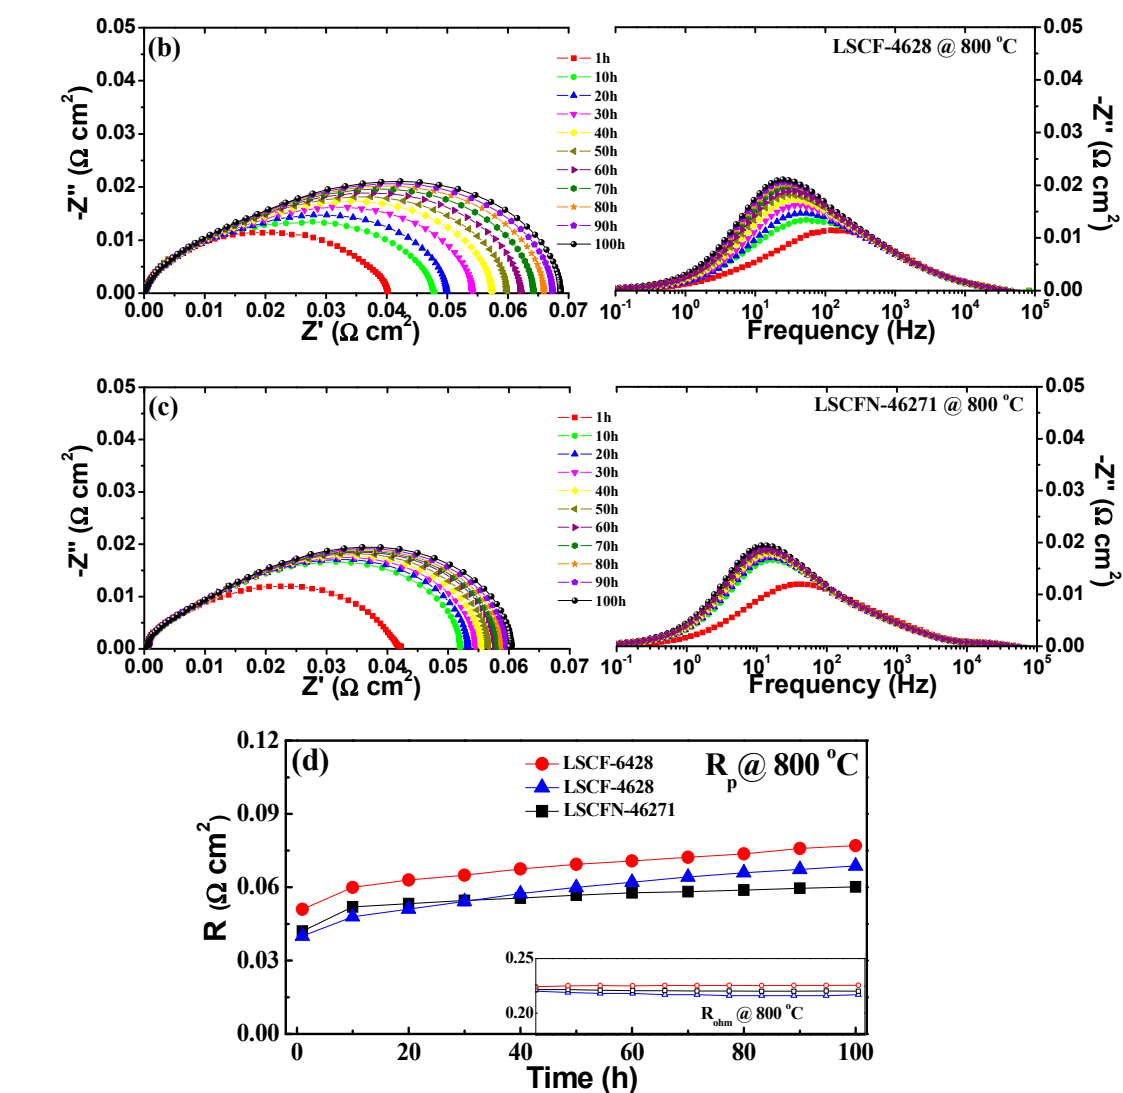

Figure S2. EIS stability test of 3 symmetrical electrodes in air at 800 °C.

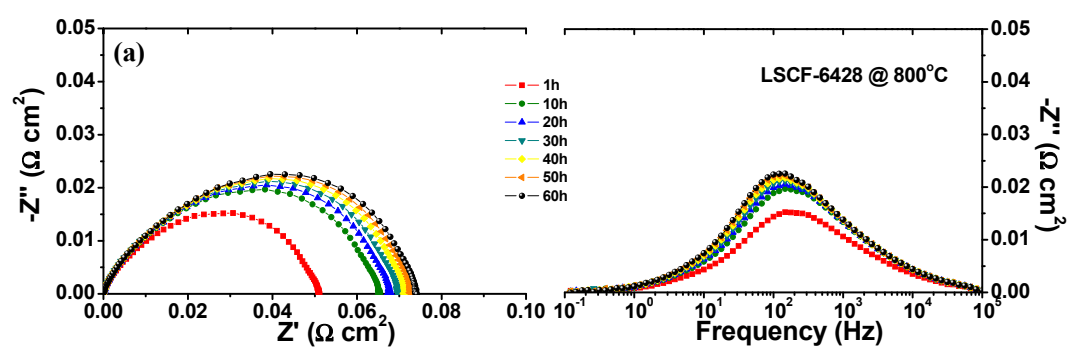

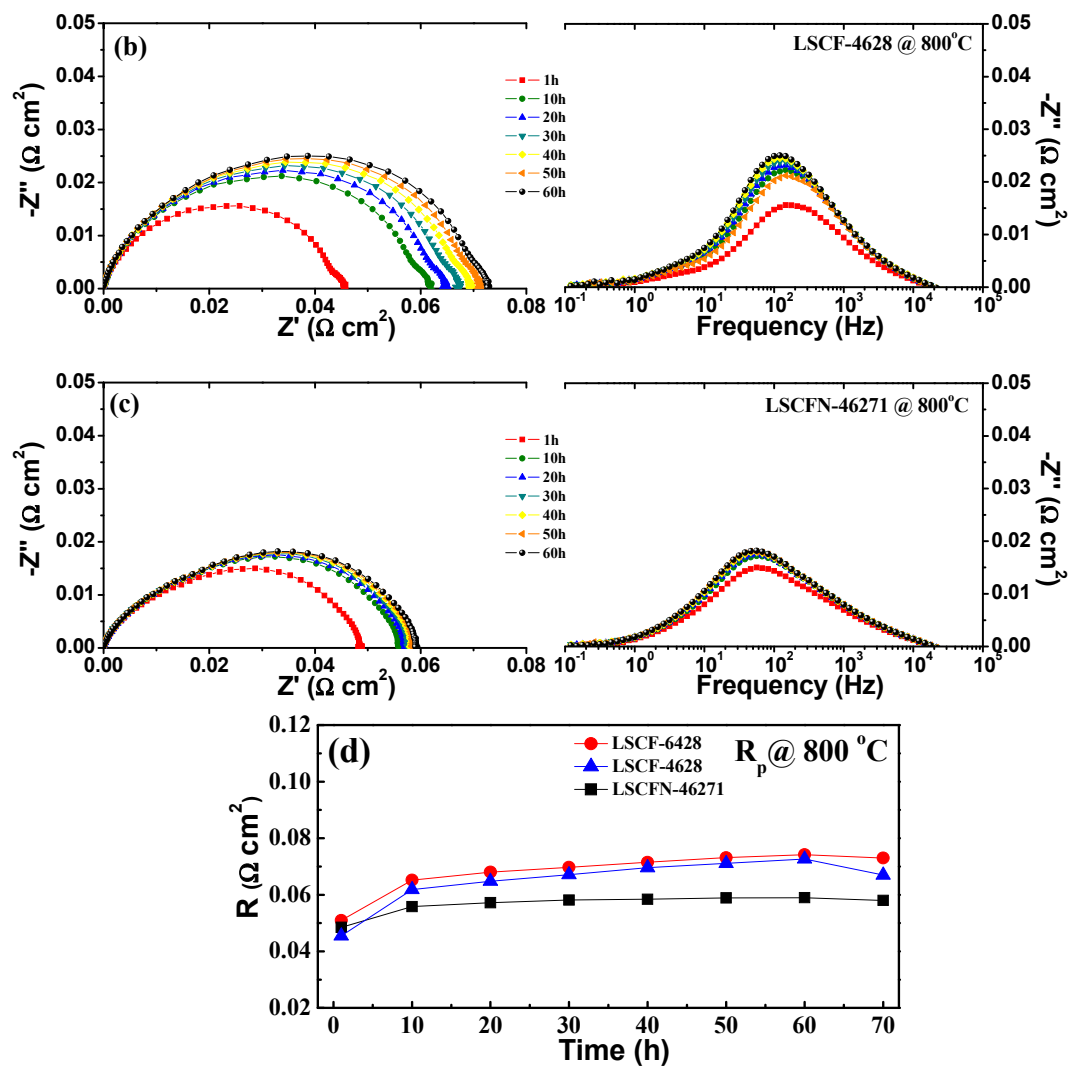

Figure S3. EIS test of the stability of 3 symmetrical electrodes in 20% CO<sub>2</sub>-80% Air at 800 °C.

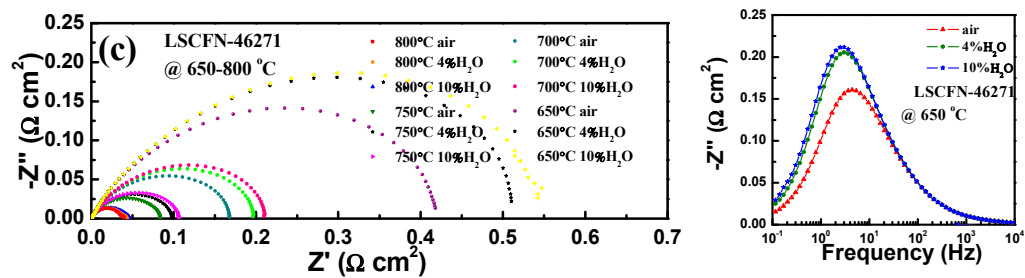

**Figure S4.** Nyquist plots and Bode plots of 3 electrodes under different H<sub>2</sub>O concentration at 650-800 °C.

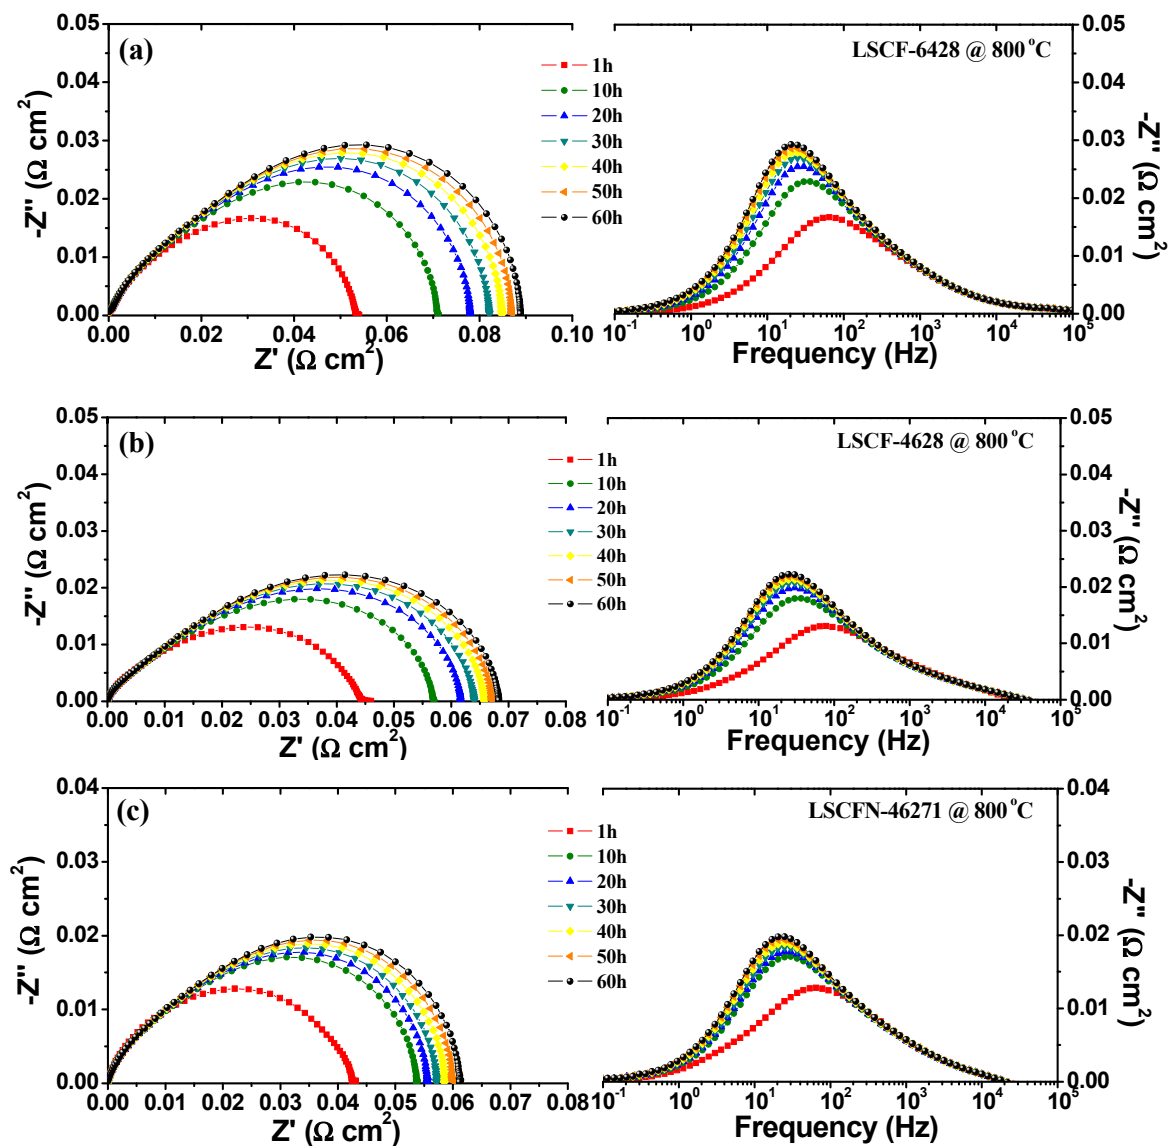

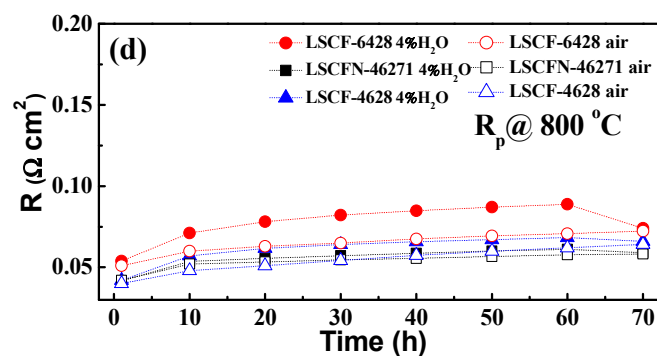

Figure S5. EIS stability test of 3 symmetrical electrodes in 4% H<sub>2</sub>O-96% Air at 800 °C.

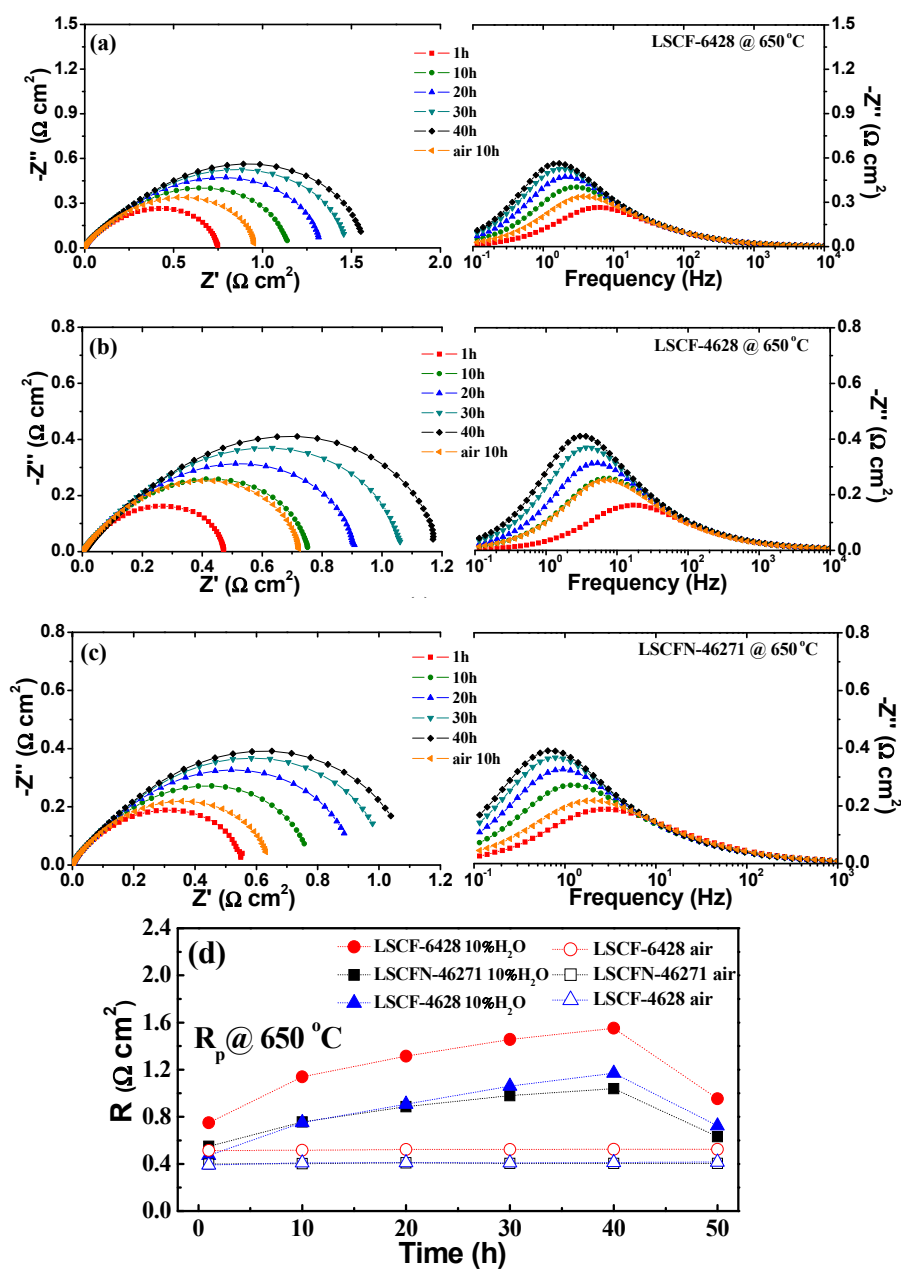

Figure S6. EIS stability test of 3 symmetrical electrodes in 10% H<sub>2</sub>O-90% Air at 650 °C.
